# Supplementary material
Source: Springer Nature journal article supplement (https://www.springermedizin.de/resource/supplementary/12936_2014_3716_MOESM1_ESM.pdf/9545266)

Advantage of a toxin over a repellent

**A**

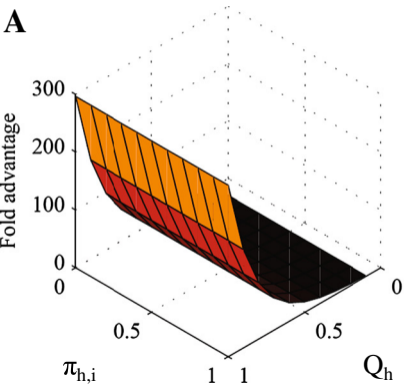

Advantage of repellent that can be used both outdoors and indoors rather than only indoors

**B**

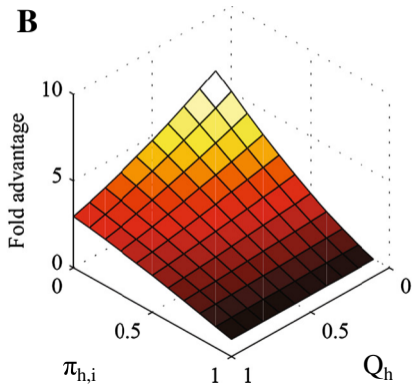

Advantage of supplementing an indoor toxin with a repellent that can be used both indoors and outdoors

**C**

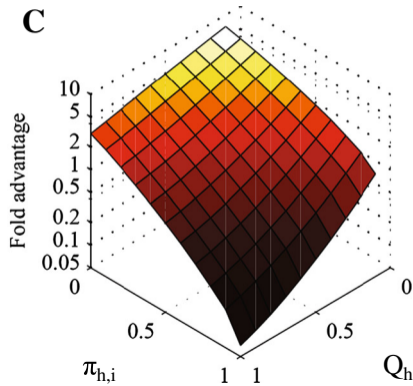

Supplement: MOESM1 [file 9545266]
